# Supplementary material for: An Integrated Model of the Transcriptome of HER2-Positive Breast Cancer
Source: PLoS One. 2013 Nov 1;8(11):e79298. doi: 10.1371/journal.pone.0079298 (PMC3815156; doi:10.1371/journal.pone.0079298)
Supplement: Table S7 — Summary of eSNVs. Summary of eSNVs per sample and per breast tumor subtype. (XLSX) [file pone.0079298.s009.xlsx]

## Sheet: 1
Supplement Table 7: Number of novel and eSNVs obtained per tumor sample
Sample ID	Number of occurrences	Sample ID	Number of occurrences	Sample ID	Number of occurrences
BCT04.ER	20	BCT38.TN	8	BCT40.HER2	83
BCT28.ER	21	BCT33.TN	47	BCT39.HER2	52
BCT22.ER	26	BCT31.TN	55	BCT37.HER2	22
BCT14.ER	28	BRS_129.TN	57	BCT36.HER2	34
BCT26.ER	40	BRS_124.TN	59	BCT35.HER2	23
BCT12.ER	46	BCT29.TN	60	BCT34.HER2	39
BCT24.ER	55	OP_535.TN	186	BCT32.HER2	28
BCT16.ER	60			BCT30.HER2	37
Median/tumor	34		57		35.5
